# Supplementary material
Source: PubMed Central journal article supplement (PMC6854426)
Supplement: supplemental_table1_and_figure.pdf [file supplemental_table1_and_figure.pdf]

**Supplemental Table 1.** Real time PCR primers

| Gene           | ID          | Sense (5'→3')           | Antisense (5'→3')     | Product Size (bp) |
|----------------|-------------|-------------------------|-----------------------|-------------------|
| B-actin        | NM_001101.3 | ATCATG TTTGAGACCTTCAACA | CATCTCTTGCTCGAAGTCCA  | 318               |
| PPAR- $\alpha$ | NM_005036.4 | TTTCTGTCTGGGATGTCACAC   | TCTTCAAGTAGGCCTCGTAG  | 165               |
| CPT-1b         | NM_004377.3 | CGTTCCTGTACCACGAGTC     | GAAGAGGTGCCTGTTCGATCC | 158               |

**Supplemental figure 1:**

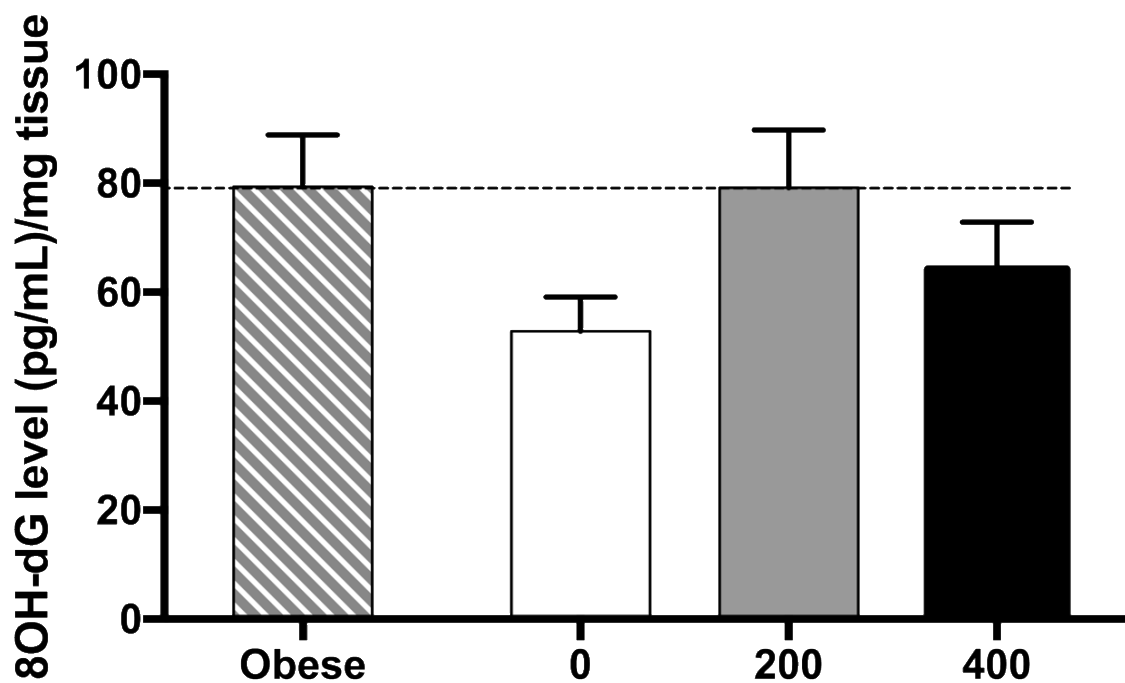

Hydrogen peroxide concentration ( $\mu\text{M}$ )
